# Supplementary material for: Ubiquitin-Dependent Modification of Skeletal Muscle by the Parasitic Nematode, Trichinella spiralis
Source: PLoS Pathog. 2016 Nov 21;12(11):e1005977. doi: 10.1371/journal.ppat.1005977 (PMC5117777; doi:10.1371/journal.ppat.1005977)
Supplement: S2 Table — Table of co-IP data showing reference results including the annotated protein sequence that is currently found in the NCBI database (“ubiquitin-conjugating enzyme E2 L3, partial” GI:339240047), all E3 proteins that co-IP'd with TsUBE2L3-HA (as well as controls) and all proteins that only co-IP'd with TsUBE2L3-HA (and neither control). E3 ligases are highlighted in bold font. (XLSX) [file ppat.1005977.s002.xlsx]

## Sheet: Sheet1
S2 Table
				Spectral counts				Normalised spectral abundance factor
Protein ID (Uniprot/GI)	Gene	Description	Length (aa)	eGFP	MmE2	TsE2	empty	eGFP	MmE2	TsE2	empty
Reference proteins that co-IP'd with TsUBE2L3-HA (as well as controls)
gi|339240047_Tsp	TsUBE2L3	T. spiralis Ub-conjugating enzyme fragment	145	0	0	11	0	0	0	0.00150395	0
sp|P68037|UB2L3_MOUSE	Ube2l3	UB2L3_MOUSE Ubiquitin-conjugating enzyme E2 L3	154	3	6	1	1	0.000336533	0.000621319	0.000128732	0.000107659
sp|Q02053|UBA1_MOUSE	Uba1	UBA1_MOUSE Ubiquitin-like modifier-activating enzyme 1	1058	0	8	5	0	0	0.000120584	9.36898e-05	0
All E3 proteins that co-IP'd with TsUBE2L3-HA (as well as controls)
sp|O70583|TRI18_MOUSE	Mid1	TRI18_MOUSE E3 ubiquitin-protein ligase Midline-1	680	1	21	16	10	2.54049e-05	0.000492486	0.000466465	0.000243817
sp|Q8C0E3|TRI47_MOUSE	Trim47	TRI47_MOUSE Tripartite motif-containing protein 47	641	0	8	11	0	0	0.000199029	0.000340207	0
sp|P46935|NEDD4_MOUSE	Nedd4	NEDD4_MOUSE E3 ubiquitin-protein ligase NEDD4	887	0	6	9	0	0	0.000107873	0.000201153	0
sp|Q922B6|TRAF7_MOUSE	Traf7	TRAF7_MOUSE E3 ubiquitin-protein ligase TRAF7	594	0	2	6	0	0	5.36942e-05	0.00020025	0
	Trip12	TRIPC_MOUSE E3 ubiquitin-protein ligase TRIP12	2025	1	7	5	0	8.53104e-06	5.51261e-05	4.895e-05	0
sp|Q9ERU9|RBP2_MOUSE	Ranbp2	RBP2_MOUSE E3 SUMO-protein ligase RanBP2	3053	0	5	3	1	0	2.61172e-05	1.94806e-05	5.43058e-06
sp|Q9Z1K6|ARI2_MOUSE	Arih2	ARI2_MOUSE E3 ubiquitin-protein ligase ARIH2	492	0	0	3	0	0	0	0.000120883	0
sp|Q61510|TRI25_MOUSE	Trim25	TRI25_MOUSE E3 ubiquitin/ISG15 ligase TRIM25	634	0	7	2	0	0	0.000176073	6.25387e-05	0
sp|Q9Z1K5|ARI1_MOUSE	Arih1	ARI1_MOUSE E3 ubiquitin-protein ligase ARIH1	555	0	2	1	0	0	5.74673e-05	3.57203e-05	0
sp|Q9R1R2|TRIM3_MOUSE	Trim3	TRIM3_MOUSE Tripartite motif-containing protein 3	744	0	0	1	0	0	0	2.66462e-05	0
All proteins that ONLY co-IP'd with TsUBE2L3-HA (and neither control)
sp|Q9Z1K6|ARI2_MOUSE	Arih2	ARI2_MOUSE E3 ubiquitin-protein ligase ARIH2	492	0	0	3	0	0	0	0.000120883	0
sp|Q91YT7|YTHD2_MOUSE	Ythdf2	YTHD2_MOUSE YTH domain-containing family protein 2	579	0	0	2	0	0	0	6.84793e-05	0
sp|Q31125|S39A7_MOUSE	Slc39a7	S39A7_MOUSE Zinc transporter SLC39A7	476	0	0	2	0	0	0	8.32973e-05	0
sp|Q9CQ48|NUDC2_MOUSE	Nudcd2	NUDC2_MOUSE NudC domain-containing protein 2	157	0	0	2	0	0	0	0.000252545	0
sp|P47226|TES_MOUSE	Tes	TES_MOUSE Testin	423	0	0	2	0	0	0	9.37341e-05	0
sp|Q9Z2H5|E41L1_MOUSE	Epb41l1	E41L1_MOUSE Band 4.1-like protein 1	879	0	0	2	0	0	0	4.51075e-05	0
sp|Q6NZC7|S23IP_MOUSE	Sec23ip	S23IP_MOUSE SEC23-interacting protein	998	0	0	2	0	0	0	3.9729e-05	0
sp|Q8BKG3|PTK7_MOUSE	Ptk7	PTK7_MOUSE Inactive tyrosine-protein kinase 7	1062	0	0	1	0	0	0	1.86674e-05	0
sp|Q9ERS6|IRPL2_MOUSE	Il1rapl2	IRPL2_MOUSE X-linked interleukin-1 receptor accessory protein-like 2	686	0	0	1	0	0	0	2.88991e-05	0
sp|O88520|SHOC2_MOUSE	Shoc2	SHOC2_MOUSE Leucine-rich repeat protein SHOC-2	582	0	0	1	0	0	0	3.40632e-05	0
sp|Q99MD9|NASP_MOUSE	Nasp	NASP_MOUSE Nuclear autoantigenic sperm protein	773	0	0	1	0	0	0	2.56465e-05	0
sp|Q9R1R2|TRIM3_MOUSE	Trim3	TRIM3_MOUSE Tripartite motif-containing protein 3	744	0	0	1	0	0	0	2.66462e-05	0
sp|P00687|AMY1_MOUSE	Amy1	AMY1_MOUSE Alpha-amylase 1	511	0	0	1	0	0	0	3.8796e-05	0
sp|Q8BHL5|ELMO2_MOUSE	Elmo2	ELMO2_MOUSE Engulfment and cell motility protein 2	732	0	0	1	0	0	0	2.7083e-05	0
sp|O35368|IFI3_MOUSE	Ifi203	IFI3_MOUSE Interferon-activable protein 203	408	0	0	1	0	0	0	4.85901e-05	0
sp|P62743|AP2S1_MOUSE	Ap2s1	AP2S1_MOUSE AP-2 complex subunit sigma	142	0	0	1	0	0	0	0.000139611	0
tr|E9Q3L2|E9Q3L2_MOUSE	Pi4ka	E9Q3L2_MOUSE Protein Pi4ka	2044	0	0	1	0	0	0	9.699e-06	0
